# Supplementary material
Source: PubMed Central journal article supplement (PMC1472507)

**a**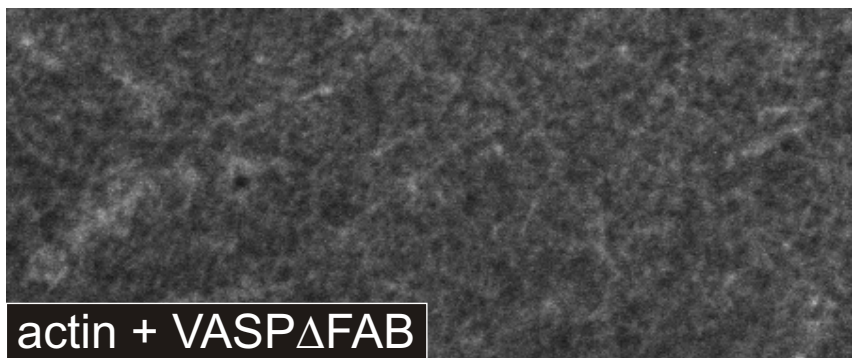**b**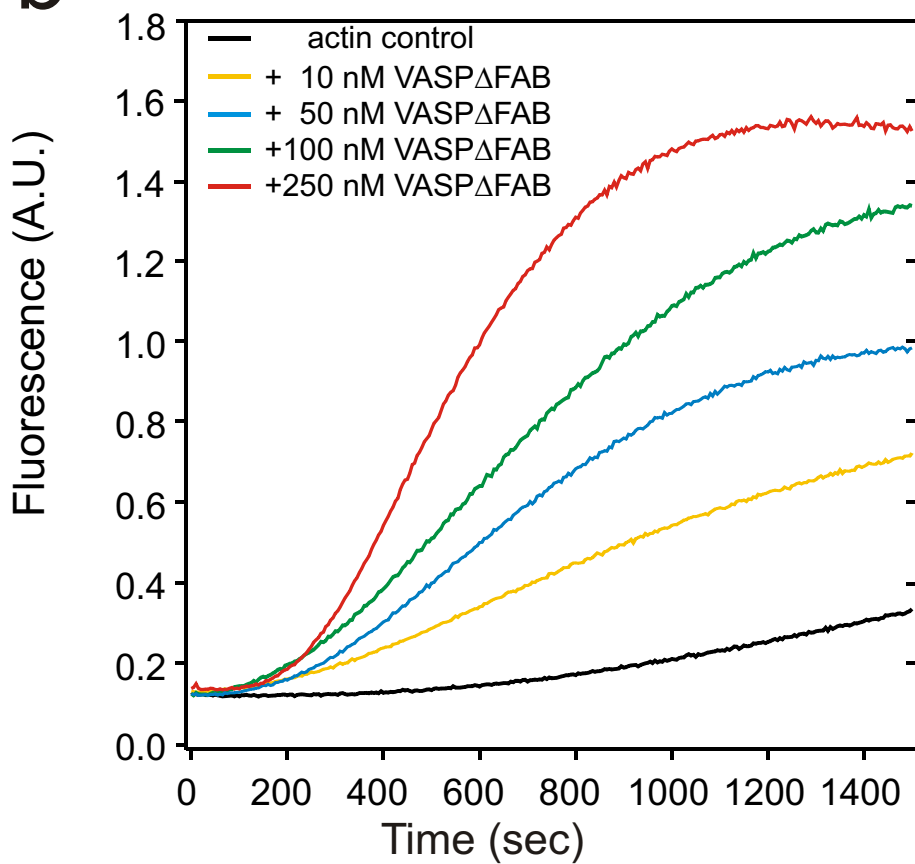

Supplement: pnas_0511243103_1.pdf [file pnas_0511243103_1.pdf]

**a**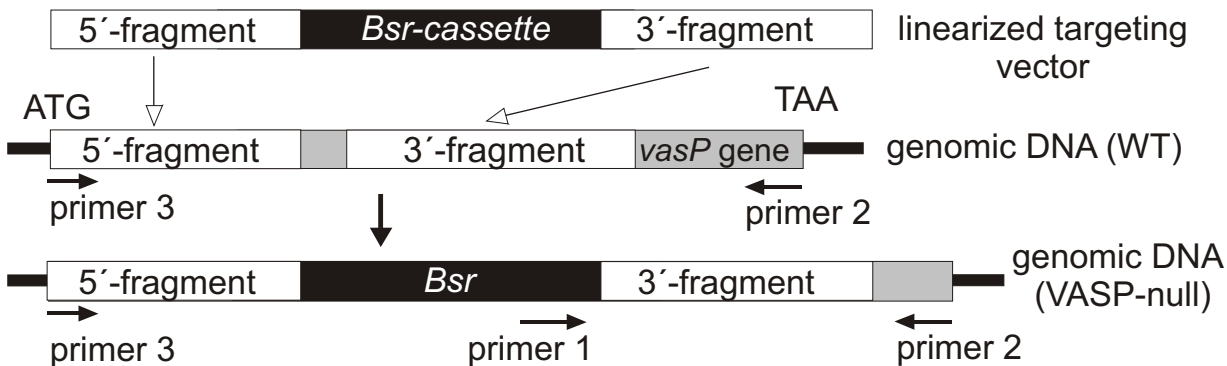**b**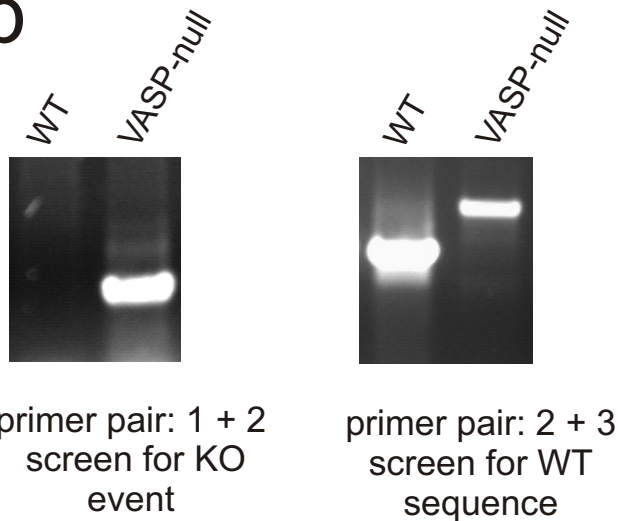

Supplement: pnas_0511243103_2.pdf [file pnas_0511243103_2.pdf]

**a**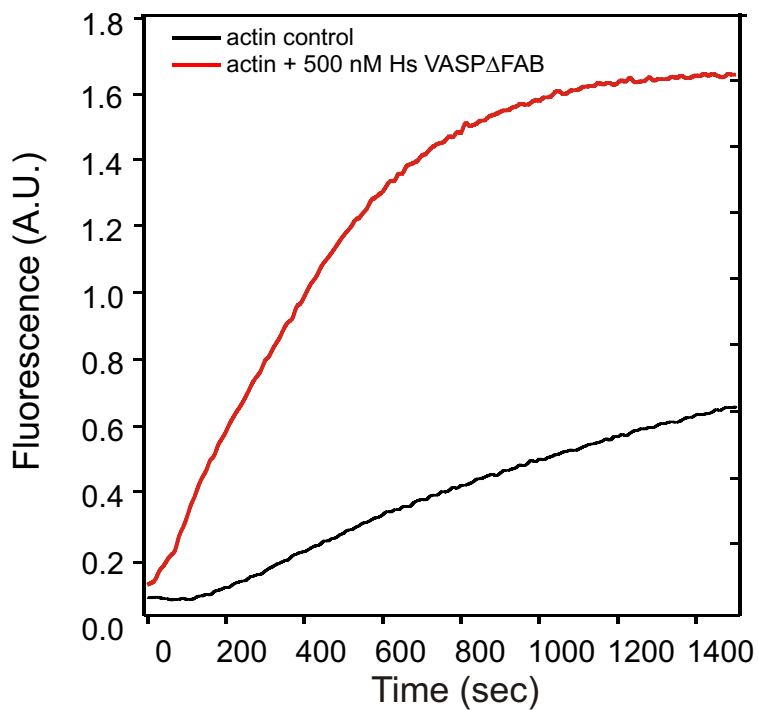**b**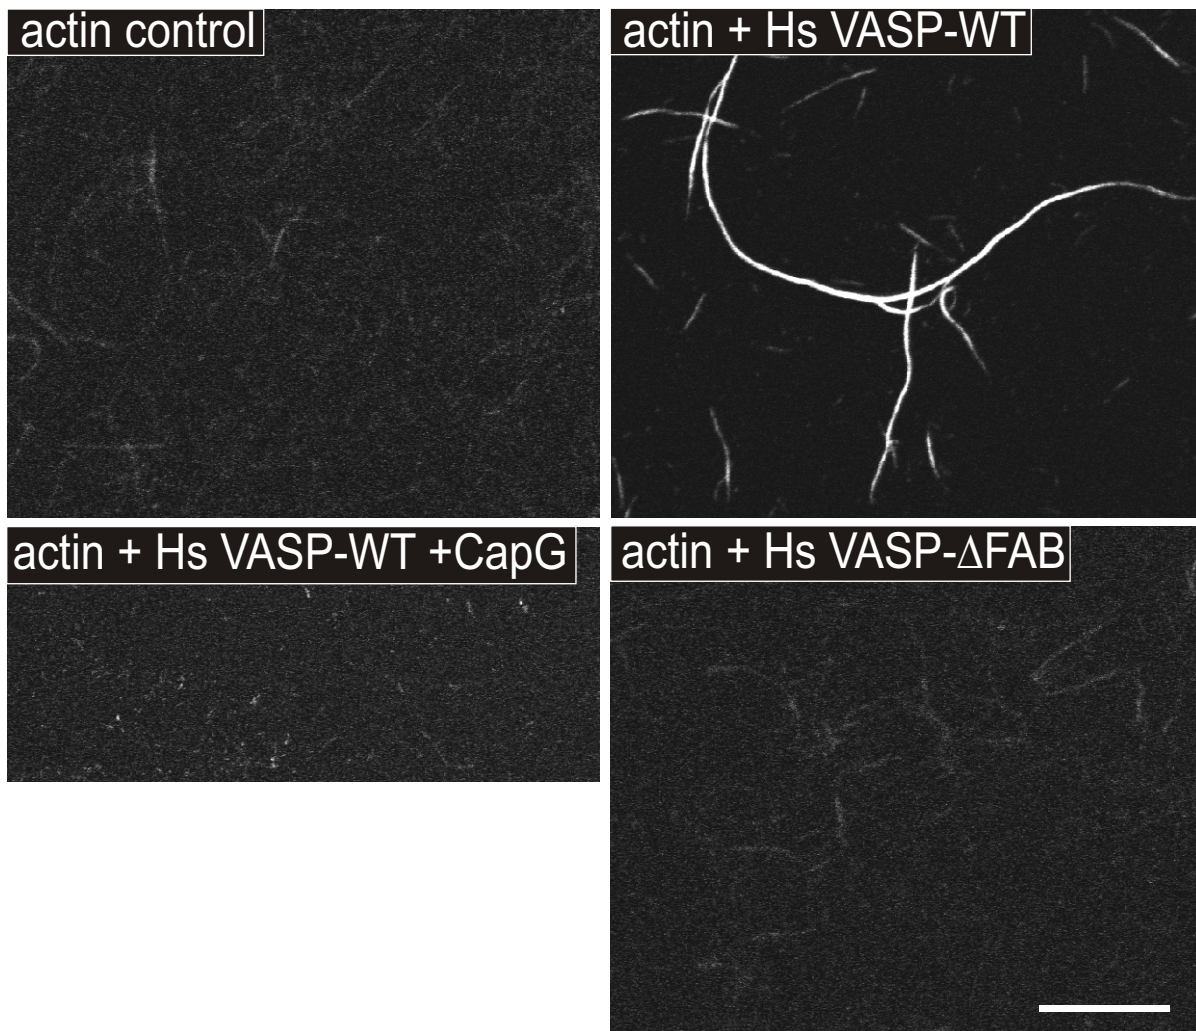

Supplement: pnas_0511243103_3.pdf [file pnas_0511243103_3.pdf]

Dd GFP-VASP WT

A

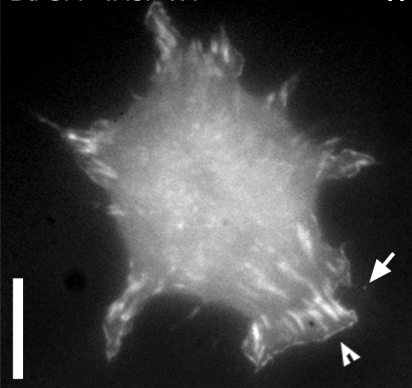

Dd GFP-VASP $\Delta$ FAB

B

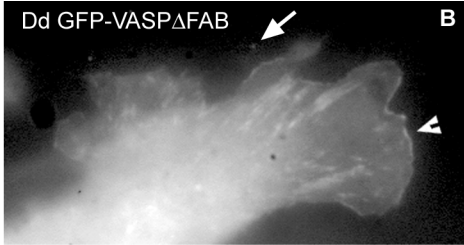

Supplement: pnas_0511243103_4.pdf [file pnas_0511243103_4.pdf]
